# Supplementary material
Source: PubMed Central journal article supplement (PMC5250691)
Supplement: DC161683SupplementaryData.pdf [file DC161683SupplementaryData.pdf]

SUPPLEMENTARY DATA

**Supplementary Table 1. Association Between Odds of Blood Glucose Level (Normal, Elevated, Hyperglycemic) and Sleep Duration (in hour increments) Controlling for Noise (n=336 mornings from 206 subjects)**

| <b>Covariate</b>       | <b>Model 1</b>     |
|------------------------|--------------------|
| Sleep Duration (hours) | 0.87* (0.78, 0.97) |
| Diabetes               | 4.01* (2.91, 8.61) |
| Leq** Tertile 1        | 0.77 (0.40, 1.46)  |
| Leq Tertile 3          | 0.77 (0.44, 1.34)  |
| Cutpoint 1             | 0.05               |
| Cutpoint 2             | 0.88               |

\* indicates  $p < 0.05$

\*\* represents equivalent continuous noise Leq as recorded by the monitor

SUPPLEMENTARY DATA

**Supplementary Table 2. Association Between Odds of Blood Glucose Level (Normal, Elevated, Hyperglycemic) and Sleep Efficiency (in 10% increments) Controlling for Noise (n=336 mornings from 206 subjects)**

| <b>Covariate</b>         | <b>Model 1</b>     |
|--------------------------|--------------------|
| Sleep Efficiency (hours) | 0.79* (0.72, 0.87) |
| Diabetes                 | 5.38* (3.16, 9.17) |
| Leq Tertile 1            | 0.79 (0.41, 1.50)  |
| Leq Tertile 3            | 0.75 (0.44, 1.29)  |
| Cutpoint 1               | -0.81              |
| Cutpoint 2               | 0.05               |

\* indicates p<0.05

SUPPLEMENTARY DATA

**Supplementary Table 3. Association Between Odds of Blood Glucose Level (Normal, Elevated, Hyperglycemic) and Sleep Duration (in hour increments) Controlling for Habitual Sleep Duration (n=364 mornings from 210 subjects)**

| <b>Covariate</b>                   | <b>Model 1</b>     |
|------------------------------------|--------------------|
| Sleep Duration (hours)             | 0.88* (0.79, 0.98) |
| Diabetes                           | 4.43* (2.63, 7.46) |
| Reported >7 hours of sleep at home | 1.40 (0.85, 2.30)  |
| Cutpoint1                          | 0.46               |
| Cutpoint 2                         | 1.21               |

\* indicates  $p < 0.05$

SUPPLEMENTARY DATA

**Supplementary Table 4. Association Between Odds of Blood Glucose Level (Normal, Elevated, Hyperglycemic) and Sleep Efficiency (in 10% increments) Controlling for Habitual Sleep Duration (n=364 mornings from 210 subjects)**

| <b>Covariate</b>                   | <b>Model 1</b>     |
|------------------------------------|--------------------|
| Sleep Efficiency (hours)           | 0.81* (0.74, 0.89) |
| Diabetes                           | 4.69* (2.80, 7.85) |
| Reported >7 hours of sleep at home | 1.37 (0.84, 2.25)  |
| Cutpoint 1                         | -0.26              |
| Cutpoint 2                         | 0.51               |

\* indicates p<0.05
